# Supplementary material for: Molecular signature of progenitor cells isolated from young and adult human hearts
Source: PubMed Central journal article supplement (PMC6006291; doi:10.1038/s41598-018-26969-2), 2018-06-18
Supplement: 41598_2018_26969_MOESM1_ESM.pdf [file 41598_2018_26969_MOESM1_ESM.pdf]

# Molecular signature of progenitor cells isolated from young and adult human hearts

Ann-Sophie Walravens<sup>1</sup>, Maarten Vanhaverbeke<sup>1</sup>, Lara Ottaviani<sup>1</sup>, Hilde Gillijns<sup>1</sup>, Sander Trenson<sup>1</sup>, Nina Vanden Driessche<sup>1</sup>, Aernout Luttun<sup>1</sup>, Bart Meyns, Paul Herijgers, Filip Rega, Ruth Heying, Maurilio Sampaolesi<sup>2</sup>, and Stefan Janssens<sup>\*1</sup>

## Supplemental data information

Figure S1

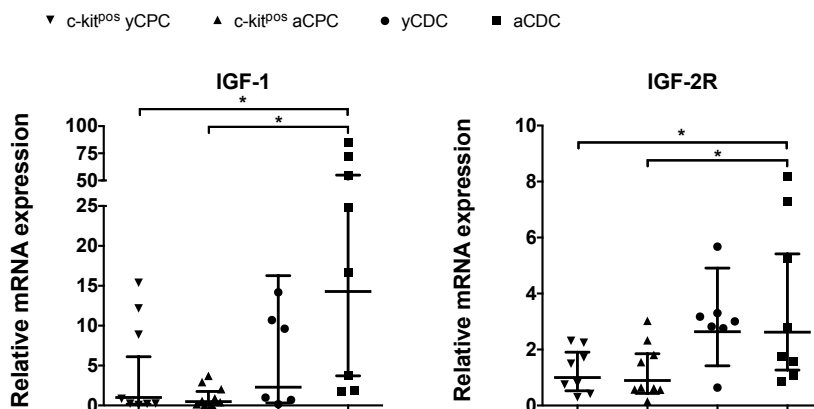

Figure S1. Gene expression levels of *IGF-1* and *IGF-2R* of young and adult c-kit<sup>pos</sup> CPCs and CDCs

c-kit<sup>pos</sup> yCPC (n=8), c-kit<sup>pos</sup> aCPC (n=9), yCDC (n=7) and aCDC (n=7). Results are geometric mean with 95% CI, Kruskal-Wallis test for non-normally distributed data, \*p<0.05. CPC, cardiac progenitor cell; CDC, cardiosphere-derived cell.

Figure S2

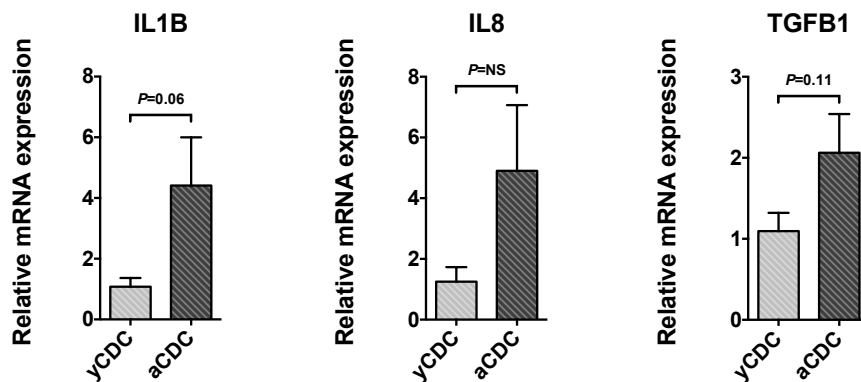

Figure S2. Gene expression confirmation of *IL1B*, *IL8* and *TGFB1* of adult c-kit<sup>pos</sup> CPCs and young and adult CDCs

Confirmation of gene expression of *IL1B*, *IL8* and *TGFB1* comparing yCDC (n=4) and aCDC (n=4). Results are shown as mean±SEM. CDC, cardiosphere-derived cell.

Figure S3

A

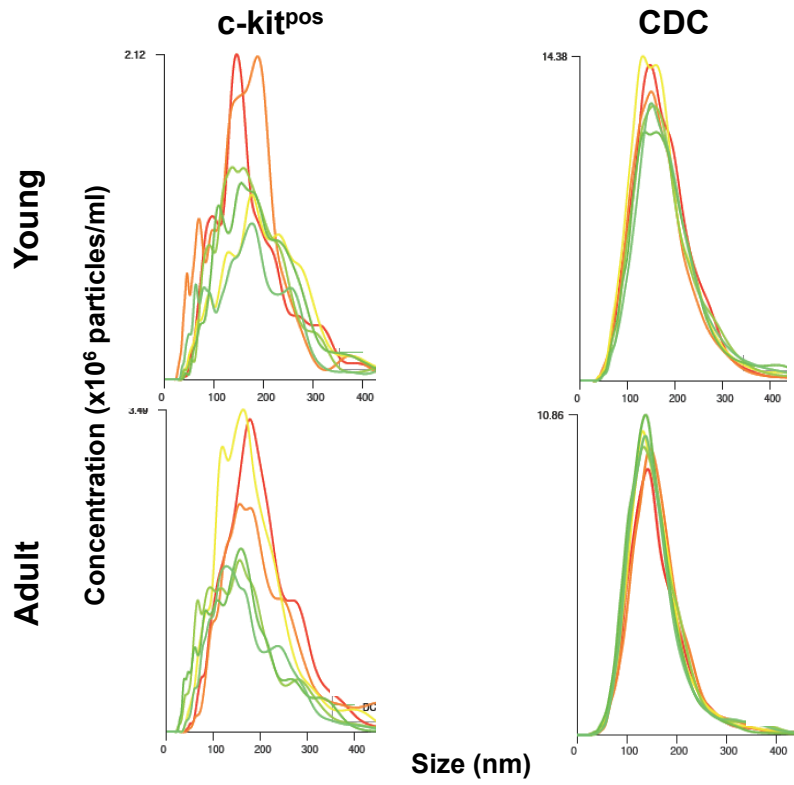

B

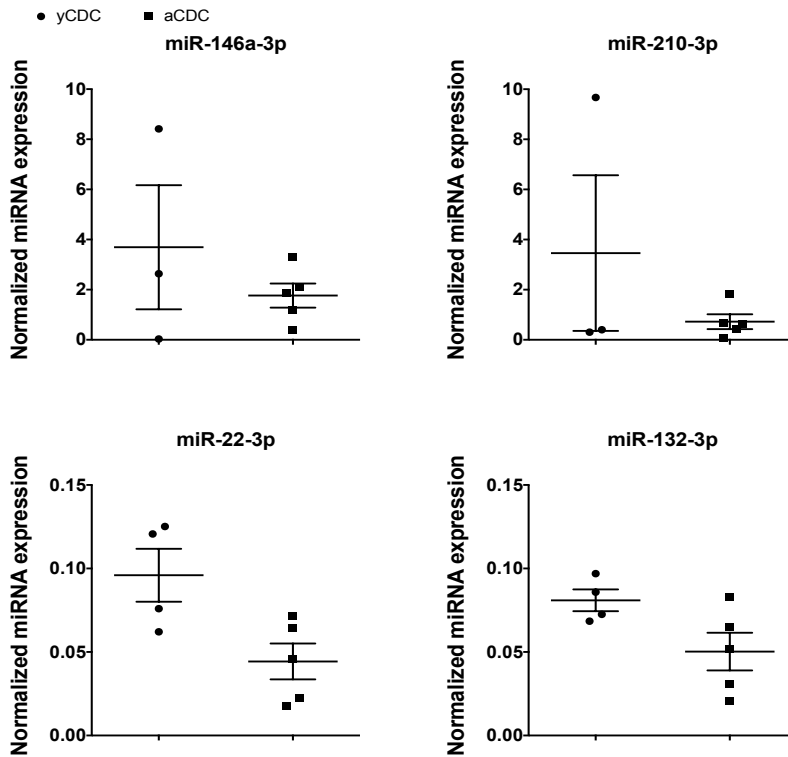

**Figure S3. Characterization of exosomes derived from adult and young c-kit<sup>pos</sup> CPCs and CDCs.**

(A) Nanoparticle analysis of c-kit<sup>pos</sup> CPCs (c-kit<sup>pos</sup> yCPC, n=3; c-kit<sup>pos</sup> aCPC, n=3) and CDCs (yCDC, n=2; aCDC, n=2)-derived nanoparticles to determine size distribution and concentration. Depicted is the nanoparticle analysis of a representative exosome sample of each group. Each image shows 6 technical replicates of that sample. CPC, cardiac progenitor cell; CDC, cardiosphere-derived cell. (B) Normalized expression levels of miR-22-3p, miR-132-3p, miR-146a-3p and miR-210-3p present in young (n=4) and adult (n=5) CDC-derived exosomes. CDC, cardiosphere-derived cell.

**Figure S4**

**A**

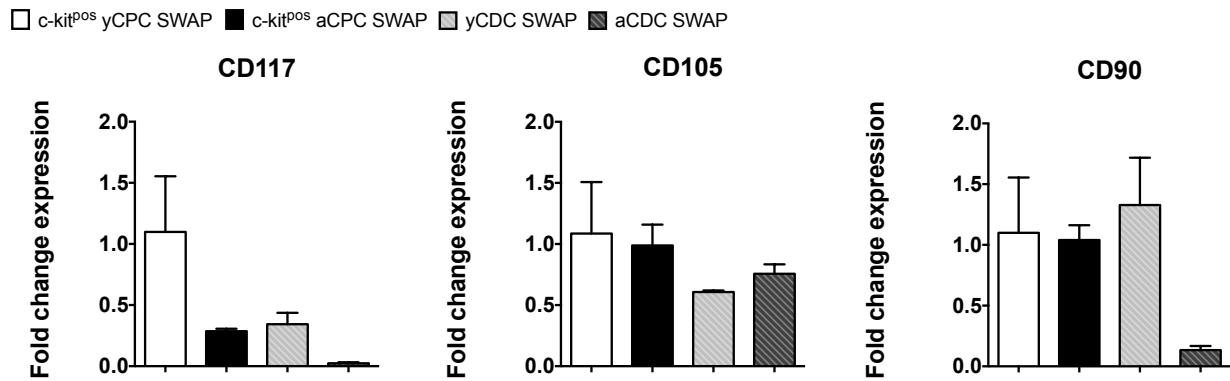

**B**

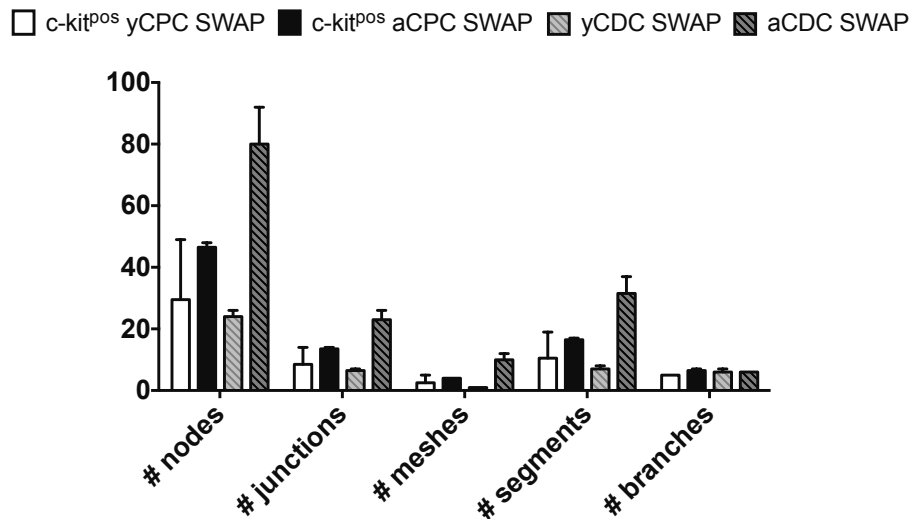

**Figure S4. Phenotypical and functional differences between c-kit<sup>pos</sup> CPCs and CDCs are independent from culture conditions.**

(A) Normalized expression levels of CD117, CD105 and CD90 in c-kit<sup>pos</sup> CPCs (young, n=2; adult, n=2) and CDCs (young, n=2; adult, n=2) after culture in their counterpart expansion medium for at least 2 passages. Results are mean±SEM. CPC, cardiac progenitor cell; CDC, cardiosphere-derived cell. (B) Analysis of network formation 6 hours after culture on Matrigel® of c-kit<sup>pos</sup> yCPCs (n=2), c-kit<sup>pos</sup> aCPCs (n=2), yCDCs (n=2) and aCDCs (n=2). Quantification of number of nodes, junctions, meshes, segments and branches normalized to analysed area. Results are mean±SEM. SWAP, CDCs cultured in c-kit<sup>pos</sup> expansion medium and c-kit<sup>pos</sup> CPCs

cultured in CDC expansion medium and fibronectin-coated culture plates; CPC, cardiac progenitor cell; CDC, cardiosphere-derived cell.

**Table S1. Overview of monoclonal antibodies used for flow cytometry**

| Monoclonal antibody | Fluorochrome | Incubation Temp. | Supplier (catalog N°)  |
|---------------------|--------------|------------------|------------------------|
| CD117 (1:100)       | APC          | 4°C              | DAKO (C7244)           |
| CD105 (1:100)       | APC          | 4°C              | BD Pharmingen (562404) |
| CD90 (1:200)        | APC          | RT               | BD Pharmingen (559869) |

APC indicates allophycocyanin.

**Table S2. Overview of primary antibodies, secondary antibodies and amplification methods used for immunofluorescence stainings of cells**

| Target                       | Primary Antibody        | Secondary Antibody | Amplification |
|------------------------------|-------------------------|--------------------|---------------|
| $\alpha$ -sarcomeric actinin | Abcam (1:100)           | RAM-Biotin (1:200) | TSA           |
| F-actin (phalloidin)         | Molecular Probes (1:50) | -                  | -             |

RAM indicates rabbit anti-mouse; TSA, tyramide signal amplification.

**Table S3. Detailed clinical characteristics of the patients**

| Patient | Age   | Gender | Cardiovascular risk factors |              |                 |           | Aetiology                |
|---------|-------|--------|-----------------------------|--------------|-----------------|-----------|--------------------------|
|         |       |        | Hypertension                | Diabetic     | Hyperlipidaemia | Smoking   |                          |
| yCPC1   | 2,5 y | M      | N/A                         | N/A          | N/A             | N/A       | ASD                      |
| yCPC2   | 14 y  | F      | N/A                         | N/A          | N/A             | N/A       | ASD                      |
| yCPC3   | 9 m   | F      | N/A                         | N/A          | N/A             | N/A       | VSD                      |
| yCPC4   | 7 m   | F      | N/A                         | N/A          | N/A             | N/A       | AVSD                     |
| yCPC5   | 8,5 m | M      | N/A                         | N/A          | N/A             | N/A       | AVSD                     |
| yCPC6   | 5,5 m | M      | N/A                         | N/A          | N/A             | N/A       | VSD                      |
| yCPC7   | 6 d   | F      | N/A                         | N/A          | N/A             | N/A       | VSD                      |
| yCPC8   | 4 m   | F      | N/A                         | N/A          | N/A             | N/A       | Tetralogy of Fallot      |
| yCPC9   | 3 d   | F      | N/A                         | N/A          | N/A             | N/A       | TGA                      |
| yCPC10  | 3 m   | F      | N/A                         | N/A          | N/A             | N/A       | VSD                      |
| yCPC11  | 2 m   | F      | N/A                         | N/A          | N/A             | N/A       | VSD                      |
| yCPC12  | 5 d   | F      | N/A                         | N/A          | N/A             | N/A       | TGA                      |
| yCPC13  | 3 m   | F      | N/A                         | N/A          | N/A             | N/A       | Tetralogy of Fallot      |
| yCPC14  | 2.5 m | F      | N/A                         | N/A          | N/A             | N/A       | Tetralogy of Fallot      |
| yCPC15  | 4 m   | M      | N/A                         | N/A          | N/A             | N/A       | AVSD                     |
| aCPC1   | 80 y  | F      | Yes                         | Pre-diabetic | Yes             | No        | MVP/MVR $\pm$ CABG       |
| aCPC2   | 70 y  | M      | Yes                         | No           | Yes             | Ex-smoker | MVP/MVR $\pm$ CABG       |
| aCPC3   | 53 y  | M      | Yes                         | Pre-diabetic | Yes             | Ex-smoker | MVP/MVR $\pm$ CABG       |
| aCPC4   | 57 y  | M      | Yes                         | No           | Yes             | Ex-smoker | Other                    |
| aCPC5   | 81 y  | M      | Yes                         | No           | Yes             | No        | Complex valvular disease |
| aCPC6   | 73 y  | M      | Yes                         | Diabetic     | No              | Active    | MVP/MVR $\pm$ CABG       |
| aCPC7   | 73 y  | M      | Yes                         | Diabetic     | Yes             | No        | AVP/AVR $\pm$ CABG       |

|               |       |   |     |              |     |           |                          |
|---------------|-------|---|-----|--------------|-----|-----------|--------------------------|
| <b>aCPC8</b>  | 68 y  | M | Yes | Diabetic     | Yes | Ex-smoker | Complex valvular disease |
| <b>aCPC9</b>  | 75 y  | F | Yes | Pre-diabetic | Yes | No        | Complex valvular disease |
| <b>aCPC10</b> | 80 y  | M | No  | No           | Yes | No        | AVP/AVR ± CABG           |
| <b>aCPC11</b> | 84 y  | F | Yes | No           | Yes | No        | Complex valvular disease |
| <b>aCPC12</b> | 79 y  | M | Yes | No           | Yes | Ex-smoker | AVP/AVR ± CABG           |
| <b>aCPC13</b> | 74 y  | F | Yes | Yes          | Yes | No        | Complex valvular disease |
| <b>aCPC14</b> | 62 y  | F | Yes | No           | Yes | Ex-smoker | MVP/MVR ± CABG           |
| <b>aCPC15</b> | 65 y  | F | Yes | Yes          | Yes | Yes       | AVP/AVR ± CABG           |
| <b>aCPC16</b> | 82 y  | F | Yes | No           | Yes | No        | Complex valvular disease |
| <b>aCPC17</b> | 79 y  | F | Yes | No           | No  | No        | MVP/MVR ± CABG           |
| <b>aCDC1</b>  | 70 y  | M | Yes | Pre-diabetic | Yes | No        | MVP/MVR ± CABG           |
| <b>aCDC2</b>  | 47 y  | M | No  | Unknown      | Yes | Active    | AVP/AVR ± CABG           |
| <b>aCDC3</b>  | 61 y  | F | No  | No           | Yes | No        | MVP/MVR ± CABG           |
| <b>aCDC4</b>  | 77 y  | M | Yes | No           | No  | Active    | Complex valvular disease |
| <b>aCDC5</b>  | 75 y  | F | Yes | No           | Yes | No        | Complex valvular disease |
| <b>aCDC6</b>  | 65 y  | M | Yes | Pre-diabetic | No  | Ex-smoker | MVP/MVR ± CABG           |
| <b>aCDC7</b>  | 56 y  | F | No  | No           | Yes | No        | MVP/MVR ± CABG           |
| <b>aCDC8</b>  | 49 y  | M | No  | No           | No  | No        | AVP/AVR ± CABG           |
| <b>aCDC9</b>  | 60 y  | M | Yes | No           | Yes | No        | Complex valvular disease |
| <b>yCDC1</b>  | 11 m  | M | N/A | N/A          | N/A | N/A       | AVSD                     |
| <b>yCDC2</b>  | 4 d   | M | N/A | N/A          | N/A | N/A       | TGA                      |
| <b>yCDC3</b>  | 5 m   | M | N/A | N/A          | N/A | N/A       | Tetralogy of Fallot      |
| <b>yCDC4</b>  | 10 y  | M | N/A | N/A          | N/A | N/A       | ASD                      |
| <b>yCDC5</b>  | 4 m   | F | N/A | N/A          | N/A | N/A       | Tetralogy of Fallot      |
| <b>yCDC6</b>  | 1,5 m | F | N/A | N/A          | N/A | N/A       | Tetralogy of Fallot      |
| <b>yCDC7</b>  | 3 m   | M | N/A | N/A          | N/A | N/A       | Tetralogy of Fallot      |

CPC indicates cardiac progenitor cell; CDC, cardiosphere-derived cell; y, years; m, months; d, days; M, male; F, female; ASD, atrial septal defect; VSD, ventricular septal defect; AVSD, atrioventricular septal defect; TGA, transposition of the great arteries, MVP/R, mitral valve repair/replacement; AVP/R, aortic valve repair/replacement; CABG, coronary artery bypass grafting; N/A, Not Applicable
